# Supplementary material for: Singlet fission in carotenoid dimers – the role of the exchange and dipolar interactions
Source: Royal Society of Chemistry journal article supplement (doi:10.1039/d4cp04445b), 2025-01-01
Supplement: d4cp04445b1.pdf [file d4cp04445b1.pdf]

# Singlet Fission in Carotenoid Dimers - The Role of the Exchange and Dipolar Interactions Supplementary Information

Alexandru G. Ichert<sup>\*,†</sup> and William Barford<sup>\*,‡</sup>

*†Department of Chemistry, Physical and Theoretical Chemistry Laboratory,  
University of Oxford, Oxford, OX1 3QZ, United Kingdom*

*Linacre College, University of Oxford, Oxford, OX1 3JA, United Kingdom*

*‡Department of Chemistry, Physical and Theoretical Chemistry Laboratory,  
University of Oxford, Oxford, OX1 3QZ, United Kingdom*

E-mail: [alexandru.ichert@chem.ox.ac.uk](mailto:alexandru.ichert@chem.ox.ac.uk); [william.barford@chem.ox.ac.uk](mailto:william.barford@chem.ox.ac.uk)

# 1. Matrix Representation of the Reduced Two-Triplet Hamiltonian, eqn. (29)

Here we give the matrix representation, in the spin-coupled basis  $|S, M_S\rangle$ , of the exchange interactions (introduced in the reduced two-triplet Hamiltonian (eqn. (29) in the main paper)), and the dipolar and Zeeman interactions. We take the axis of spin quantisation to be parallel to the principal axis  $\mathbf{Z}$ . We use the notation  $B_i \equiv B_x + iB_y$  and  $B_i^* \equiv B_x - iB_y$ . The order of the basis functions is

$$\{|0, 0\rangle, |2, 0\rangle, |2, -2\rangle, |2, +2\rangle, |2, -1\rangle, |2, +1\rangle, |1, 0\rangle, |1, -1\rangle, |1, +1\rangle\},$$

where the basis functions are defined by eqn. (2) of the main paper (taking  $i \equiv A$  and  $j \equiv B$ ).

$$\mathbf{H}_{\text{dipolar}} = \begin{bmatrix} 0 & \frac{\sqrt{8}}{3}D & \frac{2}{\sqrt{3}}E & \frac{2}{\sqrt{3}}E & 0 & 0 & 0 & 0 & 0 \\ \frac{\sqrt{8}}{3}D & -\frac{2}{3}D & \frac{2}{\sqrt{6}}E & \frac{2}{\sqrt{6}}E & 0 & 0 & 0 & 0 & 0 \\ \frac{2}{\sqrt{3}}E & \frac{2}{\sqrt{6}}E & \frac{2}{3}D & 0 & 0 & 0 & 0 & 0 & 0 \\ \frac{2}{\sqrt{3}}E & \frac{2}{\sqrt{6}}E & 0 & \frac{2}{3}D & 0 & 0 & 0 & 0 & 0 \\ 0 & 0 & 0 & 0 & -\frac{1}{3}D & E & 0 & 0 & 0 \\ 0 & 0 & 0 & 0 & E & -\frac{1}{3}D & 0 & 0 & 0 \\ 0 & 0 & 0 & 0 & 0 & 0 & \frac{2}{3}D & 0 & 0 \\ 0 & 0 & 0 & 0 & 0 & 0 & 0 & -\frac{1}{3}D & -E \\ 0 & 0 & 0 & 0 & 0 & 0 & 0 & -E & -\frac{1}{3}D \end{bmatrix} \quad (1)$$

$$\frac{\mathbf{H}_{\text{Zeeman}}}{\mu_B g} = \begin{bmatrix} 0 & 0 & 0 & 0 & 0 & 0 & 0 & 0 & 0 \\ 0 & 0 & 0 & 0 & \frac{3}{\sqrt{6}}B_i^* & \frac{3}{\sqrt{6}}B_i & 0 & 0 & 0 \\ 0 & 0 & -2B_z & 0 & B_i & 0 & 0 & 0 & 0 \\ 0 & 0 & 0 & 2B_z & 0 & B_i^* & 0 & 0 & 0 \\ 0 & \frac{3}{\sqrt{6}}B_i & B_i^* & 0 & -B_z & 0 & 0 & 0 & 0 \\ 0 & \frac{3}{\sqrt{6}}B_i^* & 0 & B_i & 0 & B_z & 0 & 0 & 0 \\ 0 & 0 & 0 & 0 & 0 & 0 & 0 & \frac{1}{\sqrt{2}}B_i^* & \frac{1}{\sqrt{2}}B_i \\ 0 & 0 & 0 & 0 & 0 & 0 & \frac{1}{\sqrt{2}}B_i & -B_z & 0 \\ 0 & 0 & 0 & 0 & 0 & 0 & \frac{1}{\sqrt{2}}B_i^* & 0 & B_z \end{bmatrix} \quad (2)$$

$$\mathbf{H}_{\text{exchange}} = \begin{bmatrix} -2J_1 - 4J_2 & 0 & 0 & 0 & 0 & 0 & 0 & 0 & 0 \\ 0 & J_1 - J_2 & 0 & 0 & 0 & 0 & 0 & 0 & 0 \\ 0 & 0 & J_1 - J_2 & 0 & 0 & 0 & 0 & 0 & 0 \\ 0 & 0 & 0 & J_1 - J_2 & 0 & 0 & 0 & 0 & 0 \\ 0 & 0 & 0 & 0 & J_1 - J_2 & 0 & 0 & 0 & 0 \\ 0 & 0 & 0 & 0 & 0 & J_1 - J_2 & 0 & 0 & 0 \\ 0 & 0 & 0 & 0 & 0 & 0 & -J_1 - J_2 & 0 & 0 \\ 0 & 0 & 0 & 0 & 0 & 0 & 0 & -J_1 - J_2 & 0 \\ 0 & 0 & 0 & 0 & 0 & 0 & 0 & 0 & -J_1 - J_2 \end{bmatrix} \quad (3)$$

## 2. Derivation of the Lindblad Rate Constants

Below we present the derived relative rates of population transfer between the coupled-spin states  $|S, M_S\rangle$ . We use the notation  $\gamma_1 \equiv \frac{1}{T_1}$  and  $\gamma_2 \equiv \frac{1}{T_2}$ . The relative rates are the values that the multiplicative factor  $r_p$  takes in the main text (see Section 2.3 and eqn. (22)).

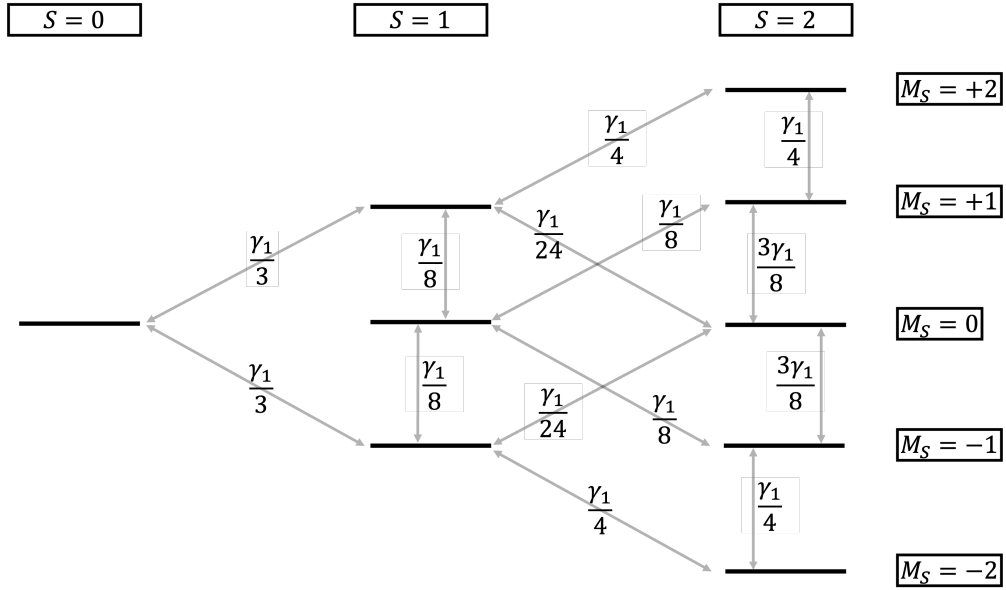

Figure 1: The derived relative rates of population transfer (i.e.,  $r_p$ ) between the spin-coupled basis states as a result of longitudinal spin-dephasing.

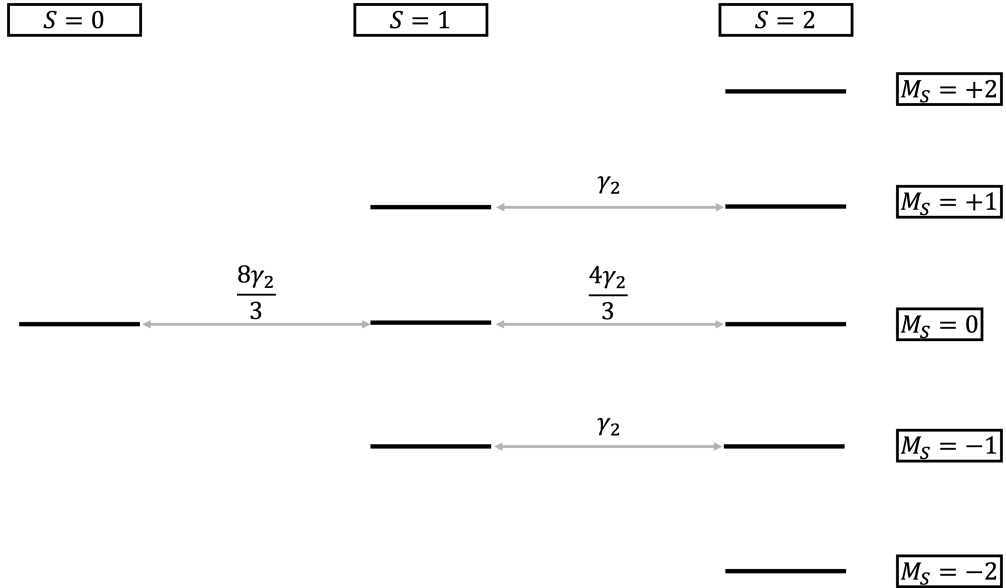

Figure 2: The derived relative rates of population transfer (i.e.,  $r_p$ ) between the spin-coupled basis states as a result of transverse spin-dephasing.
